# Supplementary material for: Chronically dysregulated NOTCH1 interactome in the dentate gyrus after traumatic brain injury
Source: PLoS One. 2017 Mar 8;12(3):e0172521. doi: 10.1371/journal.pone.0172521 (PMC5342204; doi:10.1371/journal.pone.0172521)
Supplement: S4 Table — Spreadsheet of results exported from IPA. (XLS) [file pone.0172521.s004.xls]

## Sheet: Sheet0
Categories	Diseases or Functions Annotation	p-Value	Predicted Activation State	Activation z-score	# Molecules
Cellular Movement	migration of cells	1,28E-18	Increased	4,121	29
Cellular Movement	cell movement	2,73E-21	Increased	3,724	32
Organismal Development	size of body	1,08E-08	Increased	3,622	14
Cellular Movement	invasion of cells	3,76E-12	Increased	3,596	17
Cellular Growth and Proliferation, Tissue Development	generation of cells	7,27E-18	Increased	3,534	15
Cellular Movement	invasion of tumor cell lines	1,40E-09	Increased	3,521	13
Cellular Movement	cell movement of tumor cell lines	2,99E-11	Increased	3,425	16
Cellular Movement	migration of tumor cell lines	3,29E-09	Increased	3,389	13
Cellular Movement, Immune Cell Trafficking	leukocyte migration	1,18E-10	Increased	3,373	16
Cellular Development	differentiation of cells	9,30E-22	Increased	3,283	33
Cellular Development, Hematological System Development and Function, Hematopoiesis	development of blood cells	3,30E-15	Increased	3,212	18
Cellular Movement, Hematological System Development and Function, Immune Cell Trafficking	cell movement of leukocytes	2,15E-09	Increased	3,026	14
Embryonic Development	size of embryo	4,21E-10	Increased	2,985	11
Cellular Development	differentiation of stem cells	3,20E-12	Increased	2,946	11
Gene Expression	transactivation of RNA	2,85E-10	Increased	2,935	13
Cellular Development, Embryonic Development, Organismal Development, Tissue Development	differentiation of embryonic tissue	2,53E-11	Increased	2,918	10
Cell-mediated Immune Response, Cellular Development, Cellular Function and Maintenance	differentiation of T lymphocytes	2,82E-15	Increased	2,905	15
Cellular Development, Hematological System Development and Function, Hematopoiesis	differentiation of lymphocytes	1,23E-14	Increased	2,870	16
Cellular Movement	invasion of breast cancer cell lines	3,99E-08	Increased	2,778	8
Gene Expression	transcription	2,44E-10	Increased	2,756	22
Cell-To-Cell Signaling and Interaction	activation of cells	6,63E-09	Increased	2,733	15
Cell Death and Survival	apoptosis of fibroblast cell lines	4,02E-08	Increased	2,720	9
Cellular Growth and Proliferation	expansion of cells	9,72E-10	Increased	2,698	10
Gene Expression	expression of RNA	1,28E-10	Increased	2,671	23
Gene Expression	transcription of RNA	5,76E-10	Increased	2,628	21
Cancer	cell transformation	3,16E-15	Increased	2,584	16
Cellular Movement	migration of breast cancer cell lines	6,71E-07	Increased	2,576	7
Cell-mediated Immune Response, Cellular Development, Cellular Function and Maintenance	differentiation of helper T lymphocytes	8,15E-17	Increased	2,556	13
Cancer, Cell Death and Survival, Organismal Injury and Abnormalities, Tumor Morphology	cell death of cancer cells	2,88E-07	Increased	2,529	8
Cell Cycle	cell cycle progression	8,27E-13	Increased	2,519	19
Cancer, Cell Death and Survival, Organismal Injury and Abnormalities, Tumor Morphology	necrosis of tumor	3,53E-11	Increased	2,494	12
Cancer, Cell Death and Survival, Organismal Injury and Abnormalities, Tumor Morphology	cell death of tumor cells	5,09E-10	Increased	2,494	11
Cellular Growth and Proliferation	proliferation of cells	8,04E-15	Increased	2,491	33
Cellular Development, Hematological System Development and Function	differentiation of blood cells	2,07E-14	Increased	2,435	19
Cell Death and Survival	cell survival	1,84E-11	Increased	2,435	20
Tissue Morphology	quantity of cells	2,88E-19	Increased	2,424	29
Organismal Development	development of genitourinary system	3,53E-15	Increased	2,422	20
Embryonic Development, Hair and Skin Development and Function, Organ Development	formation of skin	1,24E-07	Increased	2,416	9
Cellular Development, Embryonic Development, Hair and Skin Development and Function, Organ Development	differentiation of skin	9,17E-08	Increased	2,402	7
Cancer, Immunological Disease, Organismal Injury and Abnormalities	lymphatic node tumor	3,09E-07	Increased	2,395	10
Cell Cycle	ploidy	4,97E-08	Increased	2,393	7
Cellular Growth and Proliferation, Nervous System Development and Function	generation of neurons	5,82E-13	Increased	2,391	8
Cellular Growth and Proliferation, Tissue Development	generation of leukocytes	3,95E-08	Increased	2,389	7
Cellular Development, Embryonic Development, Organismal Development	differentiation of embryonic cells	1,50E-07	Increased	2,382	7
Cellular Development	epithelial-mesenchymal transition of tumor cell lines	4,17E-08	Increased	2,382	6
Cancer, Organismal Injury and Abnormalities	tumorigenesis of malignant tumor	5,86E-12	Increased	2,378	11
Cell Death and Survival	cell viability	4,81E-11	Increased	2,360	19
Cancer, Organismal Injury and Abnormalities	lymphoid cancer	5,48E-13	Increased	2,347	23
Cardiovascular System Development and Function, Organismal Development	angiogenesis	4,02E-15	Increased	2,337	20
Cellular Development, Tissue Development	differentiation of epithelial tissue	1,70E-11	Increased	2,310	12
Cellular Development	epithelial-mesenchymal transition	4,65E-15	Increased	2,289	12
Cellular Development	maturation of cells	1,94E-11	Increased	2,281	13
Cell Cycle	mitogenesis	5,37E-11	Increased	2,244	9
Cardiovascular System Development and Function	development of cardiovascular system	2,02E-19	Increased	2,243	25
Cellular Movement	cell movement of connective tissue cells	2,14E-08	Increased	2,240	8
Gene Expression	binding of protein binding site	1,07E-12	Increased	2,240	12
Nervous System Development and Function, Tissue Morphology	quantity of neurons	1,48E-10	Increased	2,236	12
Cardiovascular System Development and Function, Organismal Development	vasculogenesis	1,39E-15	Increased	2,235	19
Cancer, Organismal Injury and Abnormalities, Reproductive System Disease	metastasis of breast cancer cell lines	1,77E-07	Increased	2,219	5
Cellular Movement, Connective Tissue Development and Function	chemotaxis of fibroblasts	1,61E-08	Increased	2,216	5
Cellular Movement, Hematological System Development and Function, Immune Cell Trafficking	cell movement of phagocytes	5,39E-07	Increased	2,213	10
Cancer, Cellular Development, Cellular Growth and Proliferation	proliferation of tumor cells	3,79E-11	Increased	2,208	13
Cancer, Cellular Movement, Organismal Injury and Abnormalities, Tumor Morphology	invasion of tumor cells	4,57E-09	Increased	2,208	8
Hematological System Development and Function, Tissue Development	accumulation of blood cells	4,02E-10	Increased	2,204	10
Hematological System Development and Function, Immune Cell Trafficking	accumulation of leukocytes	5,81E-09	Increased	2,204	9
Cell Death and Survival, Cellular Function and Maintenance	self-renewal of cells	9,90E-08	Increased	2,200	6
Cellular Growth and Proliferation, Hematological System Development and Function	generation of T lymphocytes	9,90E-08	Increased	2,198	6
Embryonic Development, Nervous System Development and Function, Organ Development	formation of brain	2,35E-07	Increased	2,190	10
Cancer, Organismal Injury and Abnormalities	development of malignant tumor	6,63E-13	Increased	2,186	10
Cancer	Breast Cancer and Tumors	1,78E-17	Increased	2,184	26
Hematological System Development and Function, Immune Cell Trafficking	accumulation of mononuclear leukocytes	4,39E-07	Increased	2,183	6
Cellular Movement	homing of cells	3,64E-10	Increased	2,173	13
Cancer, Organismal Injury and Abnormalities, Tissue Morphology, Tumor Morphology	induction of tumor	2,58E-08	Increased	2,169	5
Cancer, Organismal Injury and Abnormalities	lymphohematopoietic cancer	5,24E-13	Increased	2,166	24
Cellular Movement	chemotaxis of cells	2,38E-09	Increased	2,146	12
Cellular Function and Maintenance	cellular homeostasis	9,75E-11	Increased	2,139	20
Cellular Movement, Hematological System Development and Function, Immune Cell Trafficking	cell movement of myeloid cells	4,35E-07	Increased	2,134	10
Embryonic Development, Organismal Development	development of body trunk	1,98E-24	Increased	2,120	28
Cancer, Cellular Development, Cellular Growth and Proliferation	proliferation of cancer cells	4,74E-10	Increased	2,110	11
Cellular Growth and Proliferation, Tissue Development	proliferation of connective tissue cells	1,17E-07	Increased	2,093	11
Cancer, Cell Death and Survival, Organismal Injury and Abnormalities, Tumor Morphology	apoptosis of tumor cells	1,03E-08	Increased	2,086	9
Cancer, Organismal Injury and Abnormalities, Reproductive System Disease	mammary tumor	1,03E-16	Increased	2,051	26
Cell-mediated Immune Response, Cellular Development	differentiation of Th17 cells	5,52E-07	Increased	2,047	5
Gene Expression	activation of DNA endogenous promoter	1,55E-11	Increased	2,044	19
Cellular Movement, Connective Tissue Development and Function	cell movement of fibroblasts	9,82E-08	Increased	2,037	7
Cancer, Gastrointestinal Disease, Organismal Injury and Abnormalities	development of digestive organ tumor	6,47E-08	Increased	2,000	5
Cardiovascular Disease, Developmental Disorder, Organismal Injury and Abnormalities	hypoplasia of trabeculae carne	7,31E-07	Decreased	-2,000	4
Neurological Disease	Neurodegeneration	6,51E-07	Decreased	-2,159	8
Cardiovascular Disease, Developmental Disorder, Organismal Injury and Abnormalities	hypoplasia of heart ventricle	5,35E-08	Decreased	-2,236	5
Organismal Injury and Abnormalities	Bleeding	8,27E-12	Decreased	-2,549	13
Developmental Disorder	hypoplasia of thorax	1,83E-10	Decreased	-2,969	9
Organismal Survival	perinatal death	1,39E-07	Decreased	-3,287	11
Developmental Disorder	Hypoplasia	5,51E-12	Decreased	-3,467	14
Developmental Disorder	hypoplasia of organ	1,52E-11	Decreased	-3,494	13
Organismal Survival	organismal death	6,85E-17	Decreased	-5,080	30

## Sheet: Sheet1
Chronically dysregulated NOTCH1 interactome in the dentate gyrus after traumatic brain injury
Noora Puhakka1, Anna Maria Bot2, Niina Vuokila1, Konrad Jozef Debski2, Katarzyna Lukasiuk2, Asla Pitkänen1
1Department of Neurobiology, A. I. Virtanen Institute for Molecular Sciences,
University of Eastern Finland, PO Box 1627, FI-70211 Kuopio, Finland
2The Nencki Institute of Experimental Biology, Polish Academy of Sciences,
3 Pasteur Str, 02-093 Warsaw, Poland
Corresponding author: Asla Pitkänen, MD, PhD
Department of Neurobiology, A. I. Virtanen Institute for Molecular Sciences, University of Eastern Finland, PO Box 1627, FI-70211 Kuopio, Finland, Tel: +358-50-517 2091, Fax: +358-17-16 3030, E-mail: asla.pitkanen@uef.fi
